# Supplementary material for: An electrochemical approach for the prediction of Δ9-tetrahydrocannabinolic acid and total cannabinoid content in Cannabis sativa L.
Source: Royal Society of Chemistry journal article supplement (doi:10.1039/d3an01090b), 2023-01-01
Supplement: d3an01090b1.pdf [file d3an01090b1.pdf]

## Electronic Supplementary Information

Figure S1

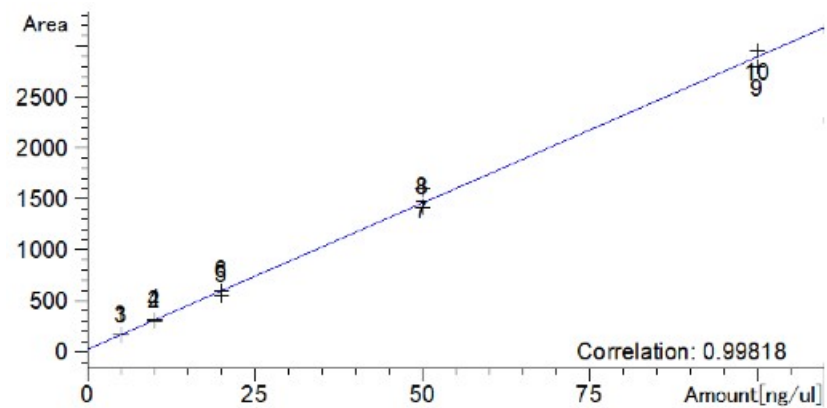

HPLC-UV calibration curve of CBDA (1)

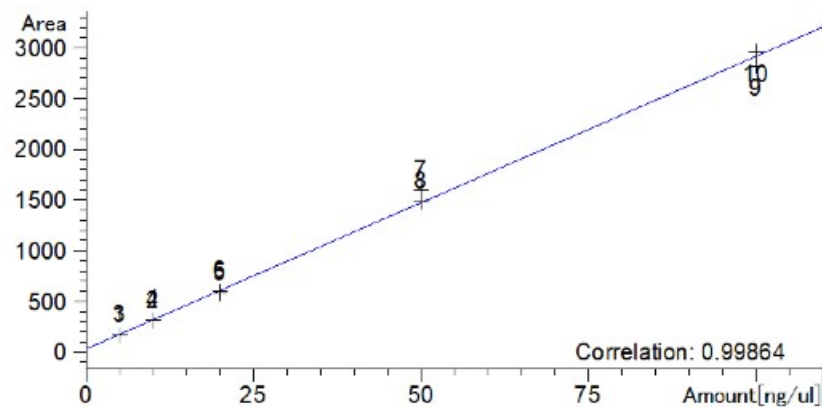

HPLC-UV calibration curve of CBGA (2)

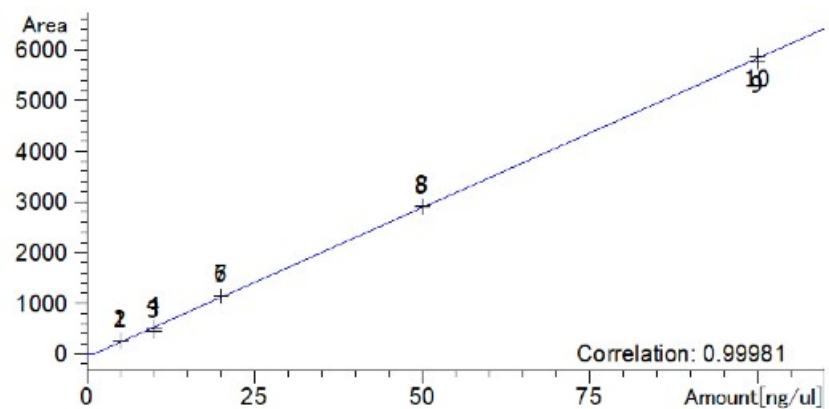

HPLC-UV calibration curve of CBG (3)

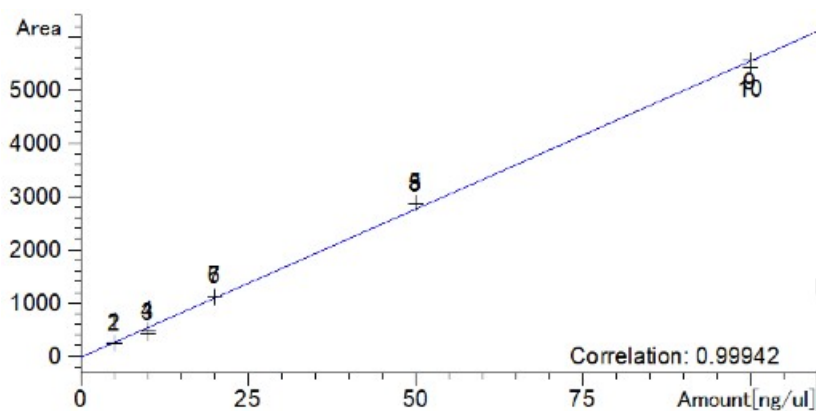

HPLC-UV calibration curve of CBD (4)

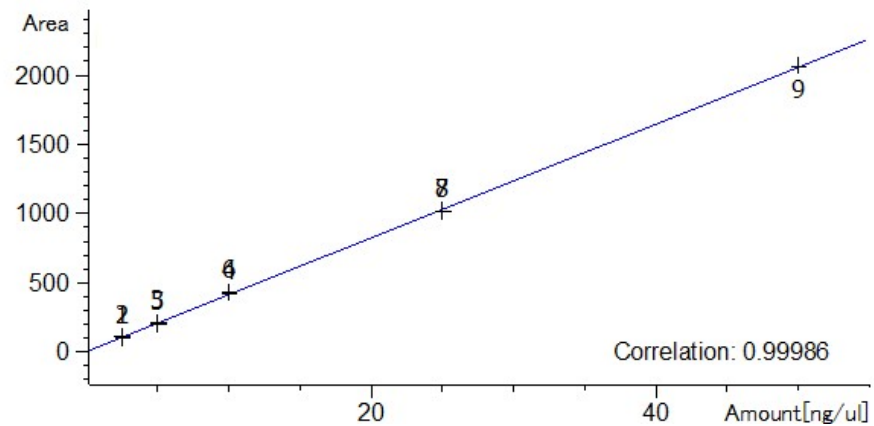

HPLC-UV calibration curve of CBN (5)

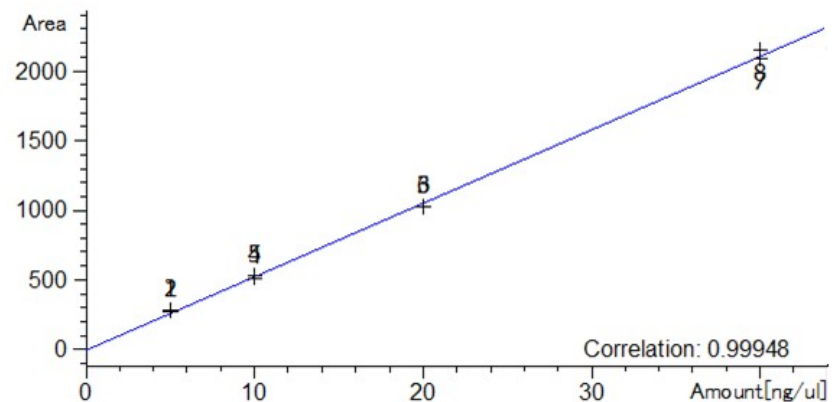

HPLC-UV calibration curve of  $\Delta^9$ -THC (6)

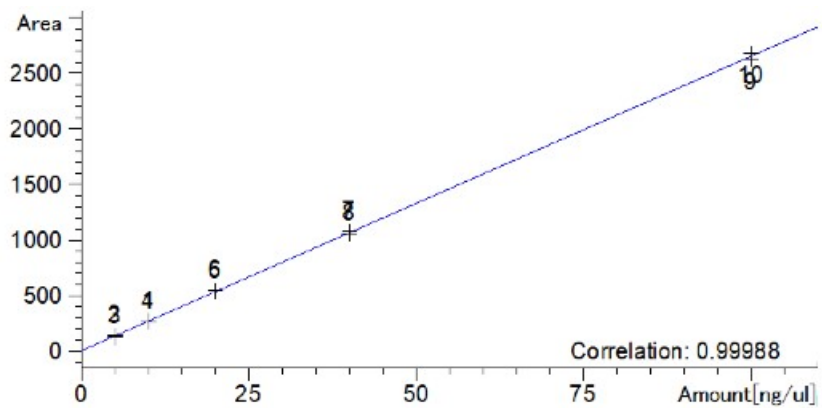

HPLC-UV calibration curve of  $\Delta^9$ -THCA (7)

Table S1: Content of cannabinoids in *Cannabis sativa* L. samples, as determined by HPLC analysis

| Sample | Cannabinoids concentration in the extracts (µM) |         |      |        |      |                     |                      | Cannabinoids content in the plant material (mg/g) |        |      |      |      |                     |                      | % Δ <sup>9</sup> -THC |
|--------|-------------------------------------------------|---------|------|--------|------|---------------------|----------------------|---------------------------------------------------|--------|------|------|------|---------------------|----------------------|-----------------------|
|        | CBD                                             | CBDA    | CBG  | CBGA   | CBN  | Δ <sup>9</sup> -THC | Δ <sup>9</sup> -THCA | CBD                                               | CBDA   | CBG  | CBGA | CBN  | Δ <sup>9</sup> -THC | Δ <sup>9</sup> -THCA |                       |
| FC1-A  | 276.16                                          | 903.97  | <LOQ | <LOQ   | <LOQ | <LOQ                | <LOD                 | 8.60                                              | 32.07  | <LOQ | <LOQ | <LOQ | <LOQ                | <LOD                 | 0.00                  |
| FC1-B  | 291.11                                          | 931.28  | <LOQ | <LOQ   | <LOQ | <LOQ                | <LOD                 | 9.10                                              | 33.20  | <LOQ | <LOQ | <LOQ | <LOQ                | <LOD                 | 0.00                  |
| FC2-A  | 565.14                                          | 1316.08 | <LOQ | 123.45 | <LOQ | 58.65               | <LOD                 | 17.60                                             | 46.83  | <LOQ | 4.41 | <LOQ | 1.83                | <LOD                 | 0.18                  |
| FC2-B  | 529.51                                          | 1330.00 | <LOQ | 115.99 | <LOQ | 56.15               | <LOD                 | 16.52                                             | 47.30  | <LOQ | 4.15 | <LOQ | 1.75                | <LOD                 | 0.18                  |
| FC3-A  | 591.25                                          | 545.62  | <LOQ | <LOQ   | <LOQ | 50.45               | <LOD                 | 18.45                                             | 19.41  | <LOQ | <LOQ | <LOQ | 1.57                | <LOD                 | 0.16                  |
| FC3-B  | 655.83                                          | 597.68  | <LOQ | <LOQ   | <LOQ | 53.00               | <LOD                 | 20.46                                             | 21.26  | <LOQ | <LOQ | <LOQ | 1.65                | <LOD                 | 0.17                  |
| FC4-A  | 274.89                                          | 265.90  | <LOQ | <LOQ   | <LOQ | <LOQ                | <LOD                 | 8.50                                              | 9.38   | <LOQ | <LOQ | <LOQ | <LOQ                | <LOD                 | 0.00                  |
| FC4-B  | 267.93                                          | 261.38  | <LOQ | <LOQ   | <LOQ | <LOQ                | <LOD                 | 8.40                                              | 9.34   | <LOQ | <LOQ | <LOQ | <LOQ                | <LOD                 | 0.00                  |
| FC5-A  | 113.95                                          | 406.15  | <LOQ | <LOQ   | <LOQ | <LOQ                | <LOD                 | 3.58                                              | 14.54  | <LOQ | <LOQ | <LOQ | <LOQ                | <LOD                 | 0.00                  |
| FC5-B  | 109.26                                          | 345.29  | <LOQ | <LOQ   | <LOQ | <LOQ                | <LOD                 | 3.39                                              | 12.23  | <LOQ | <LOQ | <LOQ | <LOQ                | <LOD                 | 0.00                  |
| FC6-A  | 370.67                                          | 834.92  | <LOQ | <LOQ   | <LOQ | 80.83               | <LOD                 | 11.67                                             | 29.96  | <LOQ | <LOQ | <LOQ | 2.54                | <LOD                 | 0.25                  |
| FC6-B  | 385.27                                          | 790.89  | <LOQ | <LOQ   | <LOQ | 83.21               | <LOD                 | 11.94                                             | 32.40  | <LOQ | <LOQ | <LOQ | 2.58                | <LOD                 | 0.26                  |
| FC7-A  | 573.09                                          | 647.13  | <LOQ | <LOQ   | <LOQ | 79.30               | <LOD                 | 18.02                                             | 23.20  | <LOQ | <LOQ | <LOQ | 2.49                | <LOD                 | 0.25                  |
| FC7-B  | 502.75                                          | 618.19  | <LOQ | <LOQ   | <LOQ | 59.33               | <LOD                 | 15.77                                             | 22.10  | <LOQ | <LOQ | <LOQ | 1.86                | <LOD                 | 0.19                  |
| FC8-A  | 583.89                                          | 628.03  | <LOQ | <LOQ   | <LOQ | <LOQ                | <LOD                 | 18.22                                             | 22.35  | <LOQ | <LOQ | <LOQ | <LOQ                | <LOD                 | 0.00                  |
| FC8-B  | 601.71                                          | 824.39  | <LOQ | <LOQ   | <LOQ | 58.49               | <LOD                 | 18.68                                             | 29.18  | <LOQ | <LOQ | <LOQ | 1.82                | <LOD                 | 0.18                  |
| FC9-A  | 777.61                                          | 3013.32 | <LOQ | <LOQ   | <LOD | 93.37               | 48.15                | 24.31                                             | 107.38 | <LOQ | <LOQ | <LOD | 2.92                | 1.72                 | 0.44                  |
| FC9-B  | 792.21                                          | 3118.52 | <LOQ | <LOQ   | <LOD | 103.10              | 47.95                | 24.66                                             | 110.65 | <LOQ | <LOQ | <LOD | 3.21                | 1.70                 | 0.47                  |
| FC10-A | 638.12                                          | 1621.00 | <LOQ | <LOQ   | <LOD | 65.55               | <LOQ                 | 20.05                                             | 58.07  | <LOQ | <LOQ | <LOD | 2.06                | <LOQ                 | 0.21                  |
| FC10-B | 616.15                                          | 1548.10 | <LOQ | <LOQ   | <LOD | 67.39               | <LOQ                 | 19.35                                             | 55.41  | <LOQ | <LOQ | <LOD | 2.12                | <LOQ                 | 0.21                  |
| FC11-A | 636.59                                          | 1846.32 | <LOQ | <LOQ   | <LOD | 81.16               | <LOQ                 | 19.85                                             | 65.64  | <LOQ | <LOQ | <LOD | 2.53                | <LOQ                 | 0.25                  |
| FC11-B | 659.09                                          | 1878.38 | <LOQ | <LOQ   | <LOD | 84.32               | <LOQ                 | 20.71                                             | 67.29  | <LOQ | <LOQ | <LOD | 2.65                | <LOQ                 | 0.26                  |
| FC12-A | 806.93                                          | 1087.57 | <LOQ | <LOQ   | <LOD | 68.52               | <LOQ                 | 25.15                                             | 38.65  | <LOQ | <LOQ | <LOD | 2.14                | <LOQ                 | 0.21                  |
| FC12-B | 784.73                                          | 1008.06 | <LOQ | <LOQ   | <LOD | 66.71               | <LOQ                 | 24.54                                             | 35.94  | <LOQ | <LOQ | <LOD | 2.09                | <LOQ                 | 0.21                  |
| FC13-A | 851.78                                          | 2902.41 | <LOQ | 53.76  | <LOD | 103.29              | 59.16                | 26.19                                             | 101.73 | <LOQ | 1.89 | <LOD | 3.18                | 2.07                 | 0.50                  |
| FC13-B | 881.24                                          | 3018.27 | <LOQ | 52.54  | <LOD | 113.37              | 60.93                | 27.62                                             | 107.86 | <LOQ | 1.89 | <LOD | 3.55                | 2.18                 | 0.55                  |
| FC14-A | 883.07                                          | 2539.37 | <LOQ | <LOQ   | <LOD | 107.20              | <LOQ                 | 27.63                                             | 90.62  | <LOQ | <LOQ | <LOD | 3.35                | <LOQ                 | 0.34                  |
| FC14-B | 913.09                                          | 2571.12 | <LOQ | <LOQ   | <LOD | 106.63              | <LOQ                 | 28.41                                             | 91.19  | <LOQ | <LOQ | <LOD | 3.32                | <LOQ                 | 0.33                  |

|               |        |         |        |        |        |        |         |       |        |      |      |       |       |        |       |
|---------------|--------|---------|--------|--------|--------|--------|---------|-------|--------|------|------|-------|-------|--------|-------|
| <b>FC15-A</b> | 187.52 | 1678.83 | <LOQ   | <LOQ   | <LOD   | <LOQ   | 48.49   | 5.84  | 59.64  | <LOQ | <LOQ | <LOD  | <LOQ  | 1.72   | 0.15  |
| <b>FC15-B</b> | 193.39 | 1807.13 | <LOQ   | <LOQ   | <LOD   | <LOQ   | 55.47   | 6.05  | 64.50  | <LOQ | <LOQ | <LOD  | <LOQ  | 1.98   | 0.17  |
| <b>FC16-A</b> | 573.33 | 1546.56 | <LOQ   | <LOQ   | <LOD   | <LOQ   | <LOQ    | 17.87 | 54.96  | <LOQ | <LOQ | <LOD  | <LOQ  | <LOQ   | 0.00  |
| <b>FC16-B</b> | 565.05 | 1098.35 | <LOQ   | <LOQ   | <LOD   | <LOQ   | <LOQ    | 17.81 | 52.86  | <LOQ | <LOQ | <LOD  | <LOQ  | <LOQ   | 0.00  |
| <b>FC17-A</b> | 297.52 | 1422.43 | <LOQ   | <LOQ   | <LOQ   | <LOQ   | <LOQ    | 9.36  | 50.99  | <LOQ | <LOQ | <LOQ  | <LOQ  | <LOQ   | 0.00  |
| <b>FC17-B</b> | 288.85 | 1378.76 | <LOQ   | <LOQ   | <LOQ   | <LOQ   | <LOQ    | 9.08  | 49.43  | <LOQ | <LOQ | <LOQ  | <LOQ  | <LOQ   | 0.00  |
| <b>RC1-A</b>  | <LOQ   | 104.90  | <LOQ   | 108.50 | <LOQ   | 477.07 | 3137.49 | <LOQ  | 3.76   | <LOQ | 3.91 | <LOQ  | 15.00 | 112.48 | 11.36 |
| <b>RC1-B</b>  | <LOQ   | 100.89  | <LOQ   | 108.32 | <LOQ   | 572.23 | 3175.24 | <LOQ  | 3.62   | <LOQ | 3.90 | <LOQ  | 18.00 | 113.83 | 11.78 |
| <b>RC2-A</b>  | <LOQ   | <LOQ    | <LOQ   | <LOQ   | 252.96 | 861.19 | 1311.28 | <LOQ  | <LOQ   | <LOQ | <LOQ | 7.85  | 27.08 | 47.01  | 6.83  |
| <b>RC2-B</b>  | 125.26 | <LOQ    | 159.68 | <LOQ   | 369.88 | 973.83 | 805.80  | 3.94  | <LOQ   | 5.05 | <LOQ | 11.48 | 30.63 | 28.89  | 5.60  |
| <b>RC3-A</b>  | <LOQ   | <LOQ    | <LOD   | <LOD   | <LOQ   | 125.06 | 3251.27 | <LOQ  | <LOQ   | <LOD | <LOD | <LOQ  | 3.93  | 116.56 | 10.62 |
| <b>RC3-B</b>  | <LOQ   | <LOQ    | <LOD   | <LOD   | <LOQ   | 125.57 | 4274.46 | <LOQ  | <LOQ   | <LOD | <LOD | <LOQ  | 3.95  | 153.24 | 13.83 |
| <b>RC4-A</b>  | <LOQ   | <LOQ    | <LOD   | <LOD   | <LOQ   | <LOQ   | 146.65  | <LOQ  | <LOQ   | <LOD | <LOD | <LOQ  | <LOQ  | 5.26   | 0.46  |
| <b>RC4-B</b>  | <LOQ   | <LOQ    | <LOD   | <LOD   | <LOQ   | <LOQ   | 233.82  | <LOQ  | <LOQ   | <LOD | <LOD | <LOQ  | <LOQ  | 8.38   | 0.74  |
| <b>RC5-A</b>  | <LOQ   | <LOQ    | <LOQ   | <LOQ   | <LOD   | 210.83 | 5259.08 | <LOQ  | <LOQ   | <LOQ | <LOQ | <LOD  | 6.63  | 188.54 | 17.20 |
| <b>RC5-B</b>  | <LOQ   | <LOQ    | <LOQ   | <LOQ   | <LOD   | 188.70 | 5277.30 | <LOQ  | <LOQ   | <LOQ | <LOQ | <LOD  | 5.93  | 189.19 | 17.19 |
| <b>RC6-A</b>  | <LOQ   | 1945.38 | <LOQ   | <LOQ   | <LOD   | 148.28 | 2235.30 | <LOQ  | 69.74  | <LOQ | <LOQ | <LOD  | 4.66  | 80.14  | 7.49  |
| <b>RC6-B</b>  | <LOQ   | 185.98  | <LOQ   | <LOQ   | <LOD   | 146.43 | 2537.13 | <LOQ  | 6.67   | <LOQ | <LOQ | <LOD  | 4.61  | 90.96  | 8.44  |
| <b>RC7-A</b>  | <LOQ   | <LOQ    | <LOQ   | <LOQ   | <LOD   | 441.59 | 2745.49 | <LOQ  | <LOQ   | <LOQ | <LOQ | <LOD  | 13.89 | 98.43  | 10.02 |
| <b>RC7-B</b>  | <LOQ   | <LOQ    | <LOQ   | <LOQ   | <LOD   | 382.26 | 2859.62 | <LOQ  | <LOQ   | <LOQ | <LOQ | <LOD  | 12.02 | 102.52 | 10.19 |
| <b>RC8-A</b>  | <LOQ   | <LOQ    | <LOQ   | <LOQ   | <LOD   | 156.58 | 3543.33 | <LOQ  | <LOQ   | <LOQ | <LOQ | <LOD  | 4.92  | 127.03 | 11.63 |
| <b>RC8-B</b>  | <LOQ   | <LOQ    | <LOQ   | <LOQ   | <LOD   | 314.52 | 5734.07 | <LOQ  | <LOQ   | <LOQ | <LOQ | <LOD  | 9.89  | 205.57 | 19.02 |
| <b>RC9-A</b>  | <LOQ   | <LOQ    | <LOQ   | <LOQ   | <LOD   | 148.62 | 4557.99 | <LOQ  | <LOQ   | <LOQ | <LOQ | <LOD  | 4.67  | 163.40 | 14.80 |
| <b>RC9-B</b>  | <LOQ   | <LOQ    | <LOQ   | <LOQ   | <LOD   | 181.91 | 5086.63 | <LOQ  | <LOQ   | <LOQ | <LOQ | <LOD  | 5.72  | 182.36 | 16.56 |
| <b>RC10-A</b> | <LOQ   | <LOQ    | <LOQ   | <LOQ   | <LOD   | 364.60 | 5251.98 | <LOQ  | <LOQ   | <LOQ | <LOQ | <LOD  | 11.47 | 188.28 | 17.66 |
| <b>RC10-B</b> | <LOQ   | <LOQ    | <LOQ   | <LOQ   | <LOD   | 222.97 | 4853.69 | <LOQ  | <LOQ   | <LOQ | <LOQ | <LOD  | 7.01  | 174.00 | 15.96 |
| <b>RC11-A</b> | <LOQ   | <LOQ    | <LOQ   | <LOQ   | <LOD   | 282.41 | 5423.97 | <LOQ  | <LOQ   | <LOQ | <LOQ | <LOD  | 8.88  | 194.45 | 17.94 |
| <b>RC11-B</b> | <LOQ   | <LOQ    | <LOQ   | <LOQ   | <LOD   | 203.74 | 3418.25 | <LOQ  | <LOQ   | <LOQ | <LOQ | <LOD  | 6.41  | 122.54 | 11.39 |
| <b>RC12-A</b> | 303.62 | 2626.70 | <LOQ   | <LOQ   | <LOD   | <LOQ   | 233.12  | 9.55  | 94.17  | <LOQ | <LOQ | <LOD  | <LOQ  | 8.36   | 0.73  |
| <b>RC12-B</b> | 363.43 | 2527.81 | <LOQ   | <LOQ   | <LOD   | <LOQ   | 238.81  | 11.43 | 90.62  | <LOQ | <LOQ | <LOD  | <LOQ  | 8.56   | 0.75  |
| <b>RC13-A</b> | 432.14 | 4457.00 | <LOQ   | <LOQ   | <LOD   | <LOQ   | 212.40  | 13.59 | 159.78 | <LOQ | <LOQ | <LOD  | <LOQ  | 7.61   | 0.67  |
| <b>RC13-B</b> | 472.84 | 3447.20 | <LOQ   | <LOQ   | <LOD   | <LOQ   | 176.83  | 14.87 | 123.58 | <LOQ | <LOQ | <LOD  | <LOQ  | 6.34   | 0.56  |

|               |         |         |        |        |      |        |         |       |       |      |      |      |       |        |       |
|---------------|---------|---------|--------|--------|------|--------|---------|-------|-------|------|------|------|-------|--------|-------|
| <b>RC14-A</b> | <LOQ    | <LOQ    | <LOD   | <LOD   | <LOD | 14.46  | 427.40  | <LOQ  | <LOQ  | <LOD | <LOD | <LOD | 0.45  | 15.32  | 1.39  |
| <b>RC14-B</b> | <LOQ    | <LOQ    | <LOD   | <LOD   | <LOD | 14.25  | 543.79  | <LOQ  | <LOQ  | <LOD | <LOD | <LOD | 0.45  | 19.49  | 1.75  |
| <b>RC15-A</b> | <LOQ    | <LOQ    | <LOD   | <LOD   | <LOD | <LOQ   | 1053.58 | <LOQ  | <LOQ  | <LOD | <LOD | <LOD | <LOQ  | 37.77  | 3.31  |
| <b>RC15-B</b> | <LOQ    | <LOQ    | <LOD   | <LOD   | <LOD | <LOQ   | 959.71  | <LOQ  | <LOQ  | <LOD | <LOD | <LOD | <LOQ  | 34.41  | 3.02  |
| <b>RC16-A</b> | 963.61  | 2318.51 | <LOD   | <LOD   | <LOQ | 93.89  | <LOQ    | 30.31 | 83.12 | <LOD | <LOD | <LOQ | 2.95  | <LOQ   | 0.30  |
| <b>RC16-B</b> | 978.98  | 2085.10 | <LOD   | <LOD   | <LOQ | 86.55  | <LOQ    | 30.79 | 74.75 | <LOD | <LOD | <LOQ | 2.72  | <LOQ   | 0.27  |
| <b>RC17-A</b> | 1955.24 | 1964.71 | 147.31 | <LOQ   | <LOD | 135.48 | <LOQ    | 61.49 | 70.43 | 4.66 | <LOQ | <LOD | 4.26  | <LOQ   | 0.43  |
| <b>RC17-B</b> | 1715.66 | 2160.51 | 118.24 | <LOQ   | <LOD | 122.10 | <LOQ    | 53.96 | 77.45 | 3.74 | <LOQ | <LOD | 3.84  | <LOQ   | 0.38  |
| <b>RC18-A</b> | 2070.88 | 1473.81 | 174.81 | <LOQ   | <LOQ | 118.79 | <LOQ    | 65.13 | 52.84 | 5.53 | <LOQ | <LOQ | 3.74  | <LOQ   | 0.37  |
| <b>RC18-B</b> | 2139.66 | 1954.08 | 170.79 | <LOQ   | <LOQ | 147.64 | <LOQ    | 67.29 | 70.05 | 5.41 | <LOQ | <LOQ | 4.64  | <LOQ   | 0.46  |
| <b>RC19-A</b> | 1160.26 | 1635.34 | <LOQ   | <LOQ   | <LOQ | 196.07 | 289.34  | 36.49 | 58.63 | <LOQ | <LOQ | <LOQ | 6.17  | 10.37  | 1.53  |
| <b>RC19-B</b> | 943.47  | 1251.27 | <LOQ   | <LOQ   | <LOQ | 183.51 | 295.20  | 29.67 | 44.86 | <LOQ | <LOQ | <LOQ | 5.77  | 10.58  | 1.51  |
| <b>RC20-A</b> | 1933.29 | 2410.66 | 205.20 | 174.91 | <LOQ | 145.61 | <LOQ    | 60.80 | 86.42 | 6.49 | 6.31 | <LOQ | 4.58  | <LOQ   | 0.46  |
| <b>RC20-B</b> | 1941.20 | 2410.96 | 177.44 | 146.85 | <LOQ | 158.44 | <LOQ    | 61.05 | 86.43 | 5.62 | 5.29 | <LOQ | 4.98  | <LOQ   | 0.50  |
| <b>RC21-A</b> | <LOQ    | <LOQ    | <LOQ   | <LOQ   | <LOQ | 984.30 | 4806.40 | <LOQ  | <LOQ  | <LOQ | <LOQ | <LOQ | 30.96 | 172.31 | 18.21 |
| <b>RC21-B</b> | <LOQ    | <LOQ    | <LOQ   | <LOQ   | <LOQ | 982.87 | 4799.00 | <LOQ  | <LOQ  | <LOQ | <LOQ | <LOQ | 30.91 | 172.04 | 18.18 |

Table S2. Electrochemical and chromatographic  $\Delta^9$ -THCA values determined for RC samples.

| sample | SPE-CB                                 |                                           |                     | SPE-PEDOT                                 |                        |
|--------|----------------------------------------|-------------------------------------------|---------------------|-------------------------------------------|------------------------|
|        | THCA <sub>HPLC</sub> ( $\mu\text{M}$ ) | THCA <sub>ELECTRO</sub> ( $\mu\text{M}$ ) | R <sub>SPE-CB</sub> | THCA <sub>ELECTRO</sub> ( $\mu\text{M}$ ) | R <sub>SPE-PEDOT</sub> |
| RC1_A  | 3137                                   | 2710                                      | 0.86                | 3520                                      | 1.12                   |
| RC1_B  | 3175                                   | 2795                                      | 0.88                | 2439                                      | 0.77                   |
| RC2_A  | 1311                                   | 1399                                      | 1.07                | 3759                                      | 2.87                   |
| RC2_B  | 806                                    | 882                                       | 1.09                | 1938                                      | 2.41                   |
| RC3_A  | 3251                                   | 2934                                      | 0.90                | 3943                                      | 1.21                   |
| RC3_B  | 4274                                   | 3623                                      | 0.85                | 4532                                      | 1.06                   |
| RC4_A  | 147                                    | 139                                       | 0.95                | 189                                       | 1.29                   |
| RC4_B  | 234                                    | 206                                       | 0.88                | 341                                       | 1.46                   |
| RC5_A  | 5259                                   | 4950                                      | 0.94                | 5284                                      | 1.00                   |
| RC5_B  | 5277                                   | 4995                                      | 0.95                | 5901                                      | 1.12                   |
| RC6_B  | 2537                                   | 3493                                      | 1.38                | 2863                                      | 1.13                   |
| RC7_A  | 2745                                   | 2942                                      | 1.07                | 3024                                      | 1.10                   |
| RC7_B  | 2860                                   | 3175                                      | 1.11                | 2971                                      | 1.04                   |
| RC8_A  | 3543                                   | 3625                                      | 1.02                | 2973                                      | 0.84                   |
| RC8_B  | 5734                                   | 5322                                      | 0.93                | 5742                                      | 1.00                   |
| RC9_A  | 4558                                   | 4213                                      | 0.92                | 4837                                      | 1.06                   |
| RC9_B  | 5087                                   | 4552                                      | 0.89                | 4880                                      | 0.96                   |
| RC10_A | 5252                                   | 4932                                      | 0.94                | 5671                                      | 1.08                   |
| RC10_B | 4854                                   | 5011                                      | 1.03                | 4530                                      | 0.93                   |
| RC11_A | 5424                                   | 4851                                      | 0.89                | 5515                                      | 1.02                   |
| RC11_B | 3418                                   | 3949                                      | 1.16                | 3965                                      | 1.16                   |
| RC14_A | 427                                    | 507                                       | 1.19                | 481                                       | 1.13                   |
| RC14_B | 544                                    | 608                                       | 1.12                | 589                                       | 1.08                   |
| RC15_A | 1054                                   | 1377                                      | 1.31                | 1321                                      | 1.25                   |
| RC15_B | 960                                    | 1451                                      | 1.51                | 1133                                      | 1.18                   |
| RC21_A | 4806                                   | 5174                                      | 1.08                | 5045                                      | 1.05                   |
| RC21_B | 4799                                   | 5252                                      | 1.09                | 4928                                      | 1.03                   |

Table S3. Electrochemical and chromatographic CBDA values determined for FC and RC samples.

| sample | SPE-CB                    |                              |                     | SPE-PEDOT                    |                        |
|--------|---------------------------|------------------------------|---------------------|------------------------------|------------------------|
|        | CBDA <sub>HPLC</sub> (μM) | CBDA <sub>ELECTRO</sub> (μM) | R <sub>SPE-CB</sub> | CBDA <sub>ELECTRO</sub> (μM) | R <sub>SPE-PEDOT</sub> |
| FC1-A  | 904                       | 1871                         | 2.07                |                              |                        |
| FC1-B  | 931                       | 1081                         | 1.16                |                              |                        |
| FC2-A  | 1316                      | 1434                         | 1.09                | 2455                         | 1.87                   |
| FC2-B  | 1330                      | 1537                         | 1.16                | 2577                         | 1.94                   |
| FC3-A  | 546                       | 1050                         | 1.92                | 3011                         | 5.52                   |
| FC3-B  | 598                       | 1093                         | 1.83                | 2566                         | 4.29                   |
| FC4-A  | 266                       | 648                          | 2.44                |                              |                        |
| FC4-B  | 261                       | 391                          | 1.50                |                              |                        |
| FC5-A  | 406                       | 493                          | 1.21                | 929                          | 2.29                   |
| FC5-B  | 345                       | 394                          | 1.14                | 976                          | 2.83                   |
| FC6-A  | 835                       | 1480                         | 1.77                | 2068                         | 2.48                   |
| FC6-B  | 791                       | 1199                         | 1.52                | 1910                         | 2.42                   |
| FC7-A  | 647                       | 994                          | 1.54                | 2453                         | 3.79                   |
| FC7-B  | 618                       | 1243                         | 2.01                | 1180                         | 1.91                   |
| FC8-A  | 628                       | 1458                         | 2.32                |                              |                        |
| FC8-B  | 824                       | 1293                         | 1.57                |                              |                        |
| FC9-A  | 3013                      | 3349                         | 1.11                | 4671                         | 1.55                   |
| FC9-B  | 3119                      | 3554                         | 1.14                | 4109                         | 1.32                   |
| FC10-A | 1621                      | 1949                         | 1.20                |                              |                        |
| FC10-B | 1548                      | 1736                         | 1.12                |                              |                        |
| FC11-A | 1846                      | 2042                         | 1.11                |                              |                        |
| FC11-B | 1878                      | 2698                         | 1.44                |                              |                        |
| FC12-A | 1088                      | 1593                         | 1.46                | 3104                         | 2.85                   |
| FC12-B | 1008                      | 1514                         | 1.50                | 2874                         | 2.85                   |
| FC13-A | 2902                      | 3372                         | 1.16                | 4889                         | 1.68                   |
| FC13-B | 3018                      | 3066                         | 1.02                | 5582                         | 1.85                   |

|               |      |      |      |       |      |
|---------------|------|------|------|-------|------|
| <b>FC14-A</b> | 2539 | 3789 | 1.49 |       |      |
| <b>FC14-B</b> | 2571 | 2882 | 1.12 |       |      |
| <b>FC15-A</b> | 1679 | 1827 | 1.09 | 2617  | 1.56 |
| <b>FC15-B</b> | 1807 | 1887 | 1.04 | 2810  | 1.56 |
| <b>FC16-A</b> | 1547 | 1144 | 0.74 | 2946  | 1.90 |
| <b>FC16-B</b> | 1098 | 2631 | 2.40 | 3143  | 2.86 |
| <b>FC17-A</b> | 1422 | 1626 | 1.14 | 2759  | 1.94 |
| <b>FC17-B</b> | 1379 | 1246 | 0.90 | 2973  | 2.16 |
| <b>RC6-A</b>  | 1945 | 2999 | 1.54 | 3793  | 1.95 |
| <b>RC12-A</b> | 2627 | 2855 | 1.09 | 8319  | 3.17 |
| <b>RC12-B</b> | 2528 | 2589 | 1.02 | 7742  | 3.06 |
| <b>RC13-A</b> | 4457 | 3885 | 0.87 | 10964 | 2.46 |
| <b>RC13-B</b> | 3447 | 3555 | 1.03 | 11998 | 3.48 |
| <b>RC16-A</b> | 2319 | 5565 | 2.40 | 3792  | 1.64 |
| <b>RC16-B</b> | 2085 | 3745 | 1.80 | 4002  | 1.92 |
| <b>RC17-A</b> | 1965 | 3895 | 1.98 | 7239  | 3.68 |
| <b>RC17-B</b> | 2161 | 4657 | 2.16 | 10112 | 4.68 |
| <b>RC18-A</b> | 1474 | 3656 | 2.48 | 3422  | 2.32 |
| <b>RC18-B</b> | 1954 | 3753 | 1.92 | 4599  | 2.35 |
| <b>RC19-A</b> | 1635 | 2546 | 1.56 | 5728  | 3.50 |
| <b>RC19-B</b> | 1251 | 2254 | 1.80 | 5798  | 4.63 |
| <b>RC20-A</b> | 2411 | 5130 | 2.13 | 10368 | 4.30 |
| <b>RC20-B</b> | 2411 | 4357 | 1.81 | 11547 | 4.79 |

---
